# Supplementary material for: Research prioritisation exercises related to the care of children and young people with life-limiting conditions, their parents and all those who care for them: A systematic scoping review
Source: PubMed Central journal article supplement — Palliat Med. 2018 Nov 8;32(10):1552–66. doi: 10.1177/0269216318800172 (PMC6238162; doi:10.1177/0269216318800172), 2018-11-08
Supplement: 800172_Supplementary_File_1_Search_Strategies.pdf [file 800172_Supplementary_File_1_Search_Strategies.pdf]

## Supplementary Table 1: Literature search strategies

Searches of ASSIA, CINAHL, Embase and MEDLINE were conducted and 4965 records were identified. Search strategies used are reproduced below

### ASSIA

Via ProQuest 17<sup>th</sup> February 2017

#### 164 records identified

SU.EXACT("Abused adolescent boys" OR "Abused adolescent girls" OR "Abused boys" OR "Abused children" OR "Abused disabled children" OR "Abused girls" OR "Abused preschool children" OR "Abused young children" OR "Adolescent boys" OR "Adolescent girls" OR "Adolescents" OR "Adopted children" OR "Adult children" OR "Aggressive boys" OR "Aggressive children" OR "Aggressive young boys" OR "Aggressive young children" OR "Autistic adolescent boys" OR "Autistic adolescents" OR "Autistic boys" OR "Autistic children" OR "Autistic girls" OR "Autistic infants" OR "Autistic preschool children" OR "Autistic savant young children" OR "Autistic young children" OR "Babies" OR "Baby boys" OR "Baby girls" OR "Behaviour disordered adolescent boys" OR "Behaviour disordered adolescents" OR "Behaviour disordered boys" OR "Behaviour disordered children" OR "Behaviour disordered preschool children" OR "Behaviour disordered young children" OR "Bilingual children" OR "Bilingual infants" OR "Bilingual preschool children" OR "Bilingual special needs children" OR "Biracial babies" OR "Biracial children" OR "Biracial preschool children" OR "Birth children" OR "Blind adolescents" OR "Blind babies" OR "Blind children" OR "Blind infants" OR "Blind preschool children" OR "Blind young children" OR "Blind-Deaf children" OR "Boys" OR "Brain damaged children" OR "Brain damaged infants" OR "Brain injured children" OR "Child prodigies" OR "Children" OR "Classmates" OR "Clumsy children" OR "Conduct disordered adolescent boys" OR "Conduct disordered adolescent girls" OR "Conduct disordered adolescents" OR "Conduct disordered boys" OR "Conduct disordered children" OR "Conduct disordered preschool boys" OR "Conduct disordered young children" OR "Deaf adolescents" OR "Deaf babies" OR "Deaf children" OR "Deaf girls" OR "Deaf infants" OR "Deaf preschool children" OR "Deaf young children" OR "Delinquents" OR "Developmentally delayed children" OR "Developmentally delayed infants" OR "Developmentally delayed preschool children" OR "Developmentally delayed young children" OR "Developmentally delayed young girls" OR "Developmentally disabled adolescents" OR "Developmentally disabled children" OR "Developmentally disabled infants" OR "Developmentally disabled preschool children" OR "Developmentally disabled young children" OR "Disabled adolescent boys" OR "Disabled adolescent girls" OR "Disabled babies" OR "Disabled children" OR "Disabled infants" OR "Disabled preschool children" OR "Disabled young children" OR "Disadvantaged adolescents" OR "Disadvantaged children" OR "Disadvantaged gifted children" OR "Disadvantaged preschool children" OR "Disadvantaged young children" OR "Distressed children" OR "Dying children" OR "Dyscalculic children" OR "Dyslexic adolescents" OR "Dyslexic boys" OR "Dyslexic children" OR "Dyslexic infants" OR "Dyslexic young children" OR "Emotionally disturbed adolescent boys" OR "Emotionally disturbed adolescent girls" OR "Emotionally disturbed adolescents" OR "Emotionally disturbed boys" OR "Emotionally disturbed children" OR "Emotionally disturbed girls" OR "Emotionally disturbed preschool children" OR "Emotionally disturbed runaway adolescents" OR "Emotionally disturbed young boys" OR "Emotionally disturbed young children" OR "Emotionally disturbed young girls" OR "Foster children" OR "Gifted adolescent boys" OR "Gifted adolescent girls" OR "Gifted adolescents" OR

"Gifted children" OR "Gifted girls" OR "Gifted preschool children" OR "Gifted young children" OR "Girls" OR "Grandchildren" OR "Head injured children" OR "Hearing impaired adolescents" OR "Hearing impaired babies" OR "Hearing impaired children" OR "Hearing impaired infants" OR "Hearing impaired preschool children" OR "Hearing impaired young children" OR "Homeless adolescent girls" OR "Homeless boys" OR "Homeless children" OR "Hyperactive adolescents" OR "Hyperactive boys" OR "Hyperactive children" OR "Hyperactive girls" OR "Hyperactive learning disabled children" OR "Hyperactive preschool children" OR "Hyperactive young boys" OR "Hyperactive young children" OR "Illegitimate children" OR "Infants" OR "Juvenile offenders" OR "Language disordered children" OR "Language disordered preschool children" OR "Language disordered young children" OR "Latchkey children" OR "Learning disabled adolescent boys" OR "Learning disabled adolescent girls" OR "Learning disabled adolescents" OR "Learning disabled adult children" OR "Learning disabled boys" OR "Learning disabled children" OR "Learning disabled infants" OR "Learning disabled preschool children" OR "Learning disabled young children" OR "Learning disabled young girls" OR "Low birth weight babies" OR "Low income pregnant adolescent girls" OR "Low intelligence quotient adolescents" OR "Maltreated children" OR "Maltreated young children" OR "Mathematically gifted children" OR "Medically fragile children" OR "Mentally ill boys" OR "Mentally ill children" OR "Mentally ill deaf children" OR "Mentally ill young children" OR "Missing children" OR "Motor disordered babies" OR "Motor disordered children" OR "Motor disordered infants" OR "Motor disordered young children" OR "Multiply developmentally disabled children" OR "Multiply disabled babies" OR "Multiply disabled children" OR "Multiply disabled preschool children" OR "Multiply disabled young children" OR "Neglected children" OR "Newborn babies" OR "Obese children" OR "Older children" OR "Only children" OR "Orphans" OR "Paediatrics" OR "Perinatology" OR "Phonologically disordered preschool children" OR "Phonologically disordered young children" OR "Phonologically impaired young children" OR "Playmates" OR "Poor children" OR "Postpartum adolescent girls" OR "Pregnant adolescent girls" OR "Premature babies" OR "Preschool boys" OR "Preschool children" OR "Preschool girls" OR "Pupils" OR "Reading disabled adolescents" OR "Reading disabled boys" OR "Reading disabled children" OR "Reading disabled young children" OR "Ritually abused children" OR "Runaway adolescents" OR "Scientifically gifted adolescents" OR "Second children" OR "Sensory motor impaired preschool children" OR "Service children" OR "Sexually abused adolescent boys" OR "Sexually abused adolescent girls" OR "Sexually abused adolescents" OR "Sexually abused boys" OR "Sexually abused children" OR "Sexually abused disabled children" OR "Sexually abused girls" OR "Sexually abused learning disabled adolescent girls" OR "Sexually abused preschool children" OR "Sexually abused young boys" OR "Sexually abused young children" OR "Sexually abused young girls" OR "Sick adolescents" OR "Sick babies" OR "Sick children" OR "Sick infants" OR "Sick newborn babies" OR "Sick preschool children" OR "Sick young children" OR "Socially withdrawn children" OR "Socially withdrawn young children" OR "Special needs adolescents" OR "Special needs children" OR "Special needs preschool children" OR "Special needs young children" OR "Speech disordered children" OR "Speech disordered disabled young children" OR "Speech disordered young boys" OR "Speech disordered young children" OR "Stepchildren" OR "Stillborn babies" OR "Street children" OR "Sudden infant death syndrome" OR "Surrogate children" OR "Suspected juvenile offenders" OR "Terminally ill babies" OR "Terminally ill children" OR "Terminally ill newborn babies" OR "Terminally ill young girls" OR "Thalidomide children" OR "Very low birth weight babies" OR "Violent adolescents" OR "Violent juvenile offenders" OR "Visually impaired adolescents" OR "Visually impaired children" OR "Visually impaired infants" OR "Visually impaired preschool children" OR "Visually impaired young children" OR "Wards of court" OR "Women and children" OR "Working adult children" OR "Working class adolescent boys" OR "Working class adolescent girls" OR "Working class boys" OR "Working class girls" OR "Writing disabled children" OR "Young boys" OR "Young children" OR "Young girls") OR

SU.EXACT("Infants") OR (child\* OR infant\* OR newborn\* OR new-born\* OR neonat\* OR neo-nat\* OR baby\* OR babies OR pediat\* OR paediat\* OR schoolchild\* OR preschool\*) OR (adolescen\* OR juvenile\* OR youth\* OR teenage\* OR youngster\*) OR ("young people\*" OR "young person\*") OR (family\* OR families OR parent\* OR mother\* OR father\* OR maternal OR paternal OR mom OR moms OR mum OR mums OR dad OR dads OR sister\* OR brother\* OR sibling\* OR son OR sons OR daughter\*)) AND (SU.EXACT("Priorities") OR "James Lind\*" OR (PSP OR research N4 Delphi) OR (research\* N2 priorit\* OR priorit\* N2 set\*))

## CINAHL

Via EBSCO 17<sup>th</sup> February 2017

1530 records identified

|                          |     |                                                                                                                                                                                                                                                                                                                                                                                                                                                            |                                                                                                  |
|--------------------------|-----|------------------------------------------------------------------------------------------------------------------------------------------------------------------------------------------------------------------------------------------------------------------------------------------------------------------------------------------------------------------------------------------------------------------------------------------------------------|--------------------------------------------------------------------------------------------------|
|                          | SI  | MH Child+ (Results 476,613)                                                                                                                                                                                                                                                                                                                                                                                                                                |                                                                                                  |
| <input type="checkbox"/> | S2  | (MH "Infant+")                                                                                                                                                                                                                                                                                                                                                                                                                                             | <a href="#">View Results</a> (185,559)<br><a href="#">View Details</a><br><a href="#">Edit</a>   |
| <input type="checkbox"/> | S3  | (MH "Adolescence+")                                                                                                                                                                                                                                                                                                                                                                                                                                        | <a href="#">View Results</a> (371,803)<br><a href="#">View Details</a><br><a href="#">Edit</a>   |
| <input type="checkbox"/> | S4  | (MH "Family+")                                                                                                                                                                                                                                                                                                                                                                                                                                             | <a href="#">View Results</a> (159,954)<br><a href="#">View Details</a><br><a href="#">Edit</a>   |
| <input type="checkbox"/> | S5  | ( child* or infant* or newborn* or new-born* or neonat* or neo-nat* or baby* or babies or pediat* or paediat* or schoolchild* or preschool* ) OR ( adolescen* or juvenile* or youth* or teenage* or youngster* ) OR ( "young people*" or "young person*" ) OR ( family* or families or parent* or mother* or father* or maternal or paternal or mom or moms or mum or mums or dad or dads or sister* or brother* or sibling* or son or sons or daughter* ) | <a href="#">View Results</a> (1,063,506)<br><a href="#">View Details</a><br><a href="#">Edit</a> |
| <input type="checkbox"/> | S6  | S1 OR S2 OR S3 OR S4 OR S5                                                                                                                                                                                                                                                                                                                                                                                                                                 | <a href="#">View Results</a> (1,077,682)<br><a href="#">View Details</a><br><a href="#">Edit</a> |
| <input type="checkbox"/> | S7  | "Health Priorities"                                                                                                                                                                                                                                                                                                                                                                                                                                        | <a href="#">View Results</a> (400)<br><a href="#">View Details</a><br><a href="#">Edit</a>       |
| <input type="checkbox"/> | S8  | "James Lind*" OR PSP OR research* N2 priorit* OR priorit* N2 set* OR research N4 Delphi                                                                                                                                                                                                                                                                                                                                                                    | <a href="#">View Results</a> (6,861)<br><a href="#">View Details</a><br><a href="#">Edit</a>     |
| <input type="checkbox"/> | S9  | S7 OR S8                                                                                                                                                                                                                                                                                                                                                                                                                                                   | <a href="#">View Results</a> (7,211)<br><a href="#">View Details</a><br><a href="#">Edit</a>     |
| <input type="checkbox"/> | S10 | S6 AND S9                                                                                                                                                                                                                                                                                                                                                                                                                                                  | <a href="#">View Results</a> (1,699)<br><a href="#">View Details</a><br><a href="#">Edit</a>     |
| <input type="checkbox"/> | S11 | TI "non human" or animal or animals or monkey or monkeys or chimpanzee or chimpanzees or primate or primates or macaque or macaques or hamster or hamsters or rat or rats ot mouse or mouses or mice or                                                                                                                                                                                                                                                    | <a href="#">View Results</a> (44,283)<br><a href="#">View Details</a><br><a href="#">Edit</a>    |

|                          |     |                                                                                                                                                                                                                                                                                          |                                                                                              |
|--------------------------|-----|------------------------------------------------------------------------------------------------------------------------------------------------------------------------------------------------------------------------------------------------------------------------------------------|----------------------------------------------------------------------------------------------|
|                          |     | mices or bird or birds or chicken or chickens or goat or goats or cattle or cattles or cow or cows or pig or pigs or dog or dogs or cat or cats or lamb or lambs or bovine or bovines or sheep or sheeps or rabbit or rabbits or horse or horses or equine or equines or camel or camels |                                                                                              |
| <input type="checkbox"/> | S12 | S10 not s11                                                                                                                                                                                                                                                                              | <a href="#">View Results</a> (1,697)<br><a href="#">View Details</a><br><a href="#">Edit</a> |
| <input type="checkbox"/> | S13 | S10 not s11                                                                                                                                                                                                                                                                              | <a href="#">View Results</a> (1,530)                                                         |

**Database: Embase <1974 to 2017 Week 07> via OVID**

**Records identified 2582**

- 1 exp Child/ (2558930)
- 2 exp Infant/ (1004846)
- 3 Adolescent/ (1420441)
- 4 (child\$ or infant\$ or newborn\$ or new-born\$ or neonat\$ or neo-nat\$ or baby\$ or babies or pediat\$ or paediat\$ or schoolchild\$ or preschool\$).ti,ab,kw. (2193595)
- 5 (adolescen\$ or juvenile\$ or youth\$ or teenage\$ or youngster\$).ti,ab,kw. (416842)
- 6 (young people\$ or young person\$).ti,ab,kw. (32240)
- 7 exp Family/ (532286)
- 8 (family\$ or families or parent\$ or mother\$ or father\$ or maternal or paternal or mom\$1 or mum\$1 or dad\$1 or sister\$ or brother\$ or sibling\$ or son or sons or daughter\$).ti,ab,kw. (2185709)
- 9 1 or 2 or 3 or 4 or 5 or 6 or 7 or 8 (5408917)
- 10 James Lind\$.ti,ab. (127)
- 11 psp.ti,ab. (6944)
- 12 (research\$ adj2 priorit\$).ti,ab,kw. (6140)
- 13 (priorit\$ adj2 set\$).ti,ab,kw. (4253)
- 14 (research adj4 Delphi).ti,ab. (221)
- 15 10 or 11 or 12 or 13 or 14 (17078)
- 16 9 and 15 (3172)

17 ("non human" or animal or animals or monkey or monkeys or chimpanzee or chimpanzees or primate or primates or macaque or macaques or hamster or hamsters or rat or rats or mouse or mice or mices or bird or birds or chicken or chickens or goat or goats or cattle or cattles or cow or cows or pig or pigs or dog or dogs or cat or cats or lamb or lambs or bovine or bovines or sheep or sheeps or rabbit or rabbits or horse or horses or equine or equines or camel or camels).ti. (1694542)

18 16 not 17 (3080)

19 limit 18 to yr="2000 -Current" (2582)

**Database: Ovid MEDLINE(R) Epub Ahead of Print, In-Process & Other Non-Indexed Citations, Ovid MEDLINE(R) Daily and Ovid MEDLINE(R) <1946 to Present>**

**Records identified 3171**

1 exp Child/ (1711150)

2 exp Infant/ (1033024)

3 Adolescent/ (1791294)

4 (child\* or infant\* or newborn\* or new-born\* or neonat\* or neo-nat\* or baby\* or babies or pediat\* or paediat\* or schoolchild\* or preschool\*).ti,ab,kf. (1811535)

5 (adolescen\* or juvenile\* or youth\* or teenage\* or youngster\*).ti,ab,kf. (349423)

6 (young people\* or young person\*).ti,ab,kf. (24096)

7 exp Family/ (273430)

8 (family\* or families or parent\* or mother\* or father\* or maternal or paternal or mom\*1 or mum\*1 or dad\*1 or sister\* or brother\* or sibling\* or son or sons or daughter\*).ti,ab,kf. (1533594)

9 1 or 2 or 3 or 4 or 5 or 6 or 7 or 8 (4805080)

10 Health Priorities/ (9858)

11 James Lind\*.ti,ab. (100)

12 psp.ti,ab. (4766)

13 (research\* adj2 priorit\*).ti,ab,kw. (5271)

14 (priorit\* adj2 set\*).ti,ab,kw. (3591)

15 (research adj4 Delphi).ti,ab. (178)

16 10 or 11 or 12 or 13 or 14 or 15 (22057)

17 9 and 16 (4431)

18 ("non human" or animal or animals or monkey or monkeys or chimpanzee or chimpanzees or primate or primates or macaque or macaques or hamster or hamsters or rat or rats or mouse or mice or mice or mices or bird or birds or chicken or chickens or goat or goats or cattle or cattles or cow or cows or pig or pigs or dog or dogs or cat or cats or lamb or lambs or bovine or bovines or sheep or sheeps or rabbit or rabbits or horse or horses or equine or equines or camel or camels).ti.  
(1567441)

19 17 not 18 (4373)

20 limit 19 to yr="2000 -Current" (3171)
